# Supplementary material for: Clinical and Economic Correlates of Pharmacotherapy in Patients with Essential Tremor
Source: PubMed Central journal article supplement (PMC11661014; doi:10.5334/tohm.973), 2024-12-17
Supplement: tohm-14-1-973-s1.pdf [file tohm-14-1-973-s1.pdf]

**S Table 1. Distribution of most frequent top 50 prescriptions**

| <b>Commercial population</b>         |                                     |                                                   |                                                  |                                                  |                                                 |                                                |
|--------------------------------------|-------------------------------------|---------------------------------------------------|--------------------------------------------------|--------------------------------------------------|-------------------------------------------------|------------------------------------------------|
| <b>Prescription (n, %)</b>           | <b>All ET patients<br/>N=22,641</b> | <b>0 qualified ET<br/>treatments<br/>n=11,052</b> | <b>1 qualified ET<br/>treatment<br/>n=10,195</b> | <b>2 qualified ET<br/>treatments<br/>n=1,274</b> | <b>3+ qualified ET<br/>treatments<br/>n=120</b> | <b>All non-ET<br/>patients<br/>n=7,158,471</b> |
| Propranolol hydrochloride            | 8,021 (35.4)                        | 834 (7.5)                                         | 6,234 (61.1)                                     | 870 (68.3)                                       | 83 (69.2)                                       | 96,421 (1.3)                                   |
| Prednisone                           | 5,843 (25.8)                        | 2,460 (22.3)                                      | 2,899 (28.4)                                     | 431 (33.8)                                       | 53 (44.2)                                       | 1,206,960 (16.9)                               |
| Azithromycin                         | 5,515 (24.4)                        | 2,487 (22.5)                                      | 2,595 (25.5)                                     | 385 (30.2)                                       | 48 (40.0)                                       | 1,300,377 (18.2)                               |
| Acetaminophen/hydrocodone bitartrate | 5,236 (23.1)                        | 2,063 (18.7)                                      | 2,674 (26.2)                                     | 444 (34.9)                                       | 55 (45.8)                                       | 986,536 (13.8)                                 |
| Influenza virus vaccine (subvirion)  | 4,623 (20.4)                        | 2,108 (19.1)                                      | 2,206 (21.6)                                     | 282 (22.1)                                       | 27 (22.5)                                       | 1,133,808 (15.8)                               |
| Albuterol sulfate                    | 4,606 (20.3)                        | 1,963 (17.8)                                      | 2,223 (21.8)                                     | 373 (29.3)                                       | 47 (39.2)                                       | 862,736 (12.1)                                 |
| Amoxicillin                          | 4,580 (20.2)                        | 2,036 (18.4)                                      | 2,209 (21.7)                                     | 303 (23.8)                                       | 32 (26.7)                                       | 1,210,034 (16.9)                               |
| Amoxicillin/clavulanate potassium    | 4,539 (20.0)                        | 1,967 (17.8)                                      | 2,227 (21.8)                                     | 305 (23.9)                                       | 40 (33.3)                                       | 1,058,596 (14.8)                               |
| Methylprednisolone                   | 4,471 (19.7)                        | 1,894 (17.1)                                      | 2,231 (21.9)                                     | 309 (24.3)                                       | 37 (30.8)                                       | 874,730 (12.2)                                 |
| Gabapentin                           | 4,113 (18.2)                        | 687 (6.2)                                         | 2,633 (25.8)                                     | 699 (54.9)                                       | 94 (78.3)                                       | 371,688 (5.2)                                  |
| Atorvastatin calcium                 | 4,110 (18.2)                        | 1,667 (15.1)                                      | 2,091 (20.5)                                     | 320 (25.1)                                       | 32 (26.7)                                       | 692,169 (9.7)                                  |
| Primidone                            | 3,884 (17.2)                        | 378 (3.4)                                         | 2,676 (26.2)                                     | 737 (57.8)                                       | 93 (77.5)                                       | 1,220 (0.02)                                   |
| Fluticasone propionate               | 3,543 (15.6)                        | 1,554 (14.1)                                      | 1,711 (16.8)                                     | 255 (20.0)                                       | 23 (19.2)                                       | 736,566 (10.3)                                 |
| Cyclobenzaprine hydrochloride        | 3,531 (15.6)                        | 1,377 (12.5)                                      | 1,820 (17.9)                                     | 299 (23.5)                                       | 35 (29.2)                                       | 638,723 (8.9)                                  |
| Benzonatate                          | 3,235 (14.3)                        | 1,365 (12.4)                                      | 1,589 (15.6)                                     | 255 (20.0)                                       | 26 (21.7)                                       | 667,932 (9.3)                                  |
| Cephalexin                           | 3,191 (14.1)                        | 1,329 (12.0)                                      | 1,574 (15.4)                                     | 260 (20.4)                                       | 28 (23.3)                                       | 621,739 (8.7)                                  |
| Levothyroxine sodium                 | 3,130 (13.8)                        | 1,290 (11.7)                                      | 1,551 (15.2)                                     | 262 (20.6)                                       | 27 (22.5)                                       | 567,173 (7.9)                                  |
| Omeprazole                           | 3,117 (13.8)                        | 1,269 (11.5)                                      | 1,577 (15.5)                                     | 240 (18.8)                                       | 31 (25.8)                                       | 493,602 (6.9)                                  |
| Doxycycline hyclate                  | 3,019 (13.3)                        | 1,272 (11.5)                                      | 1,470 (14.4)                                     | 252 (19.8)                                       | 25 (20.8)                                       | 589,746 (8.2)                                  |
| Meloxicam                            | 2,876 (12.7)                        | 1,183 (10.7)                                      | 1,438 (14.1)                                     | 234 (18.4)                                       | 21 (17.5)                                       | 508,465 (7.1)                                  |
| Ibuprofen                            | 2,869 (12.7)                        | 1,319 (11.9)                                      | 1,341 (13.2)                                     | 192 (15.1)                                       | 17 (14.2)                                       | 975,753 (13.6)                                 |
| Bupropion hydrochloride              | 2,767 (12.2)                        | 1,002 (9.1)                                       | 1,522 (14.9)                                     | 220 (17.3)                                       | 23 (19.2)                                       | 327,605 (4.6)                                  |
| Lisinopril                           | 2,747 (12.1)                        | 1,197 (10.8)                                      | 1,339 (13.1)                                     | 194 (15.2)                                       | 17 (14.2)                                       | 549,224 (7.7)                                  |
| Tramadol hydrochloride               | 2,712 (12.0)                        | 989 (8.9)                                         | 1,439 (14.1)                                     | 256 (20.1)                                       | 28 (23.3)                                       | 396,188 (5.5)                                  |
| Ciprofloxacin hydrochloride          | 2,667 (11.8)                        | 1,089 (9.9)                                       | 1,327 (13.0)                                     | 225 (17.7)                                       | 26 (21.7)                                       | 484,312 (6.8)                                  |
| Sulfamethoxazole/trimethoprim        | 2,601 (11.5)                        | 1,043 (9.4)                                       | 1,331 (13.1)                                     | 202 (15.9)                                       | 25 (20.8)                                       | 516,051 (7.2)                                  |
| Alprazolam                           | 2,541 (11.2)                        | 1,037 (9.4)                                       | 1,278 (12.5)                                     | 206 (16.2)                                       | 20 (16.7)                                       | 335,648 (4.7)                                  |
| Acetaminophen/oxycodone              | 2,486 (11.0)                        | 951 (8.6)                                         | 1,262 (12.4)                                     | 243 (19.1)                                       | 30 (25.0)                                       | 429,837 (6.0)                                  |

|                                                      |              |             |               |            |           |               |
|------------------------------------------------------|--------------|-------------|---------------|------------|-----------|---------------|
| hydrochloride                                        |              |             |               |            |           |               |
| Metformin hydrochloride                              | 2,380 (10.5) | 914 (8.3)   | 1,237 (12.1)  | 209 (16.4) | 20 (16.7) | 504,650 (7.0) |
| Fluconazole                                          | 2,265 (10.0) | 886 (8.0)   | 1,140 (11.2)  | 212 (16.6) | 27 (22.5) | 558,172 (7.8) |
| Amlodipine besylate                                  | 2,246 (9.9)  | 971 (8.8)   | 1,095 (10.7)  | 162 (12.7) | 18 (15.0) | 452,885 (6.3) |
| Diclofenac sodium                                    | 2,175 (9.6)  | 833 (7.5)   | 1,113 (10.9)  | 208 (16.3) | 21 (17.5) | 366,375 (5.1) |
| Pantoprazole sodium                                  | 2,172 (9.6)  | 853 (7.7)   | 1,104 (10.8)  | 187 (14.7) | 28 (23.3) | 312,558 (4.4) |
| Clonazepam                                           | 2,146 (9.5)  | 774 (7.0)   | 1,161 (11.4)  | 187 (14.7) | 24 (20.0) | 141,911 (2.0) |
| Triamcinolone acetonide                              | 2,144 (9.5)  | 973 (8.8)   | 1,001 (9.8)   | 153 (12.0) | 17 (14.2) | 451,236 (6.3) |
| Montelukast sodium                                   | 2,143 (9.5)  | 888 (8.0)   | 1,069 (10.5)  | 161 (12.6) | 25 (20.8) | 362,158 (5.1) |
| Ondansetron                                          | 2,113 (9.3)  | 848 (7.7)   | 1,060 (10.4)  | 187 (14.7) | 18 (15.0) | 390,521 (5.5) |
| Trazodone hydrochloride                              | 2,108 (9.3)  | 738 (6.7)   | 1,137 (11.20) | 212 (16.6) | 21 (17.5) | 224,861 (3.1) |
| Escitalopram oxalate                                 | 2,056 (9.1)  | 815 (7.4)   | 1,085 (10.6)  | 140 (11.0) | 16 (13.3) | 333,073 (4.7) |
| Sertraline hydrochloride                             | 2,023 (8.9)  | 800 (7.2)   | 1,050 (10.3)  | 154 (12.1) | 19 (15.8) | 323,740 (4.5) |
| Topiramate                                           | 2,003 (8.8)  | 148 (1.3)   | 1,367 (13.4)  | 412 (32.3) | 76 (63.3) | 117,721 (1.6) |
| Duloxetine hydrochloride                             | 1,892 (8.4)  | 600 (5.4)   | 1,063 (10.4)  | 205 (16.1) | 24 (20.0) | 154,042 (2.2) |
| Metoprolol succinate                                 | 1,851 (8.2)  | 1,052 (9.5) | 709 (7.0)     | 82 (6.4)   | 8 (6.7)   | 252,096 (3.5) |
| Ondansetron hydrochloride                            | 1,843 (8.1)  | 658 (6.0)   | 991 (9.7)     | 177 (13.9) | 17 (14.2) | 301,889 (4.2) |
| Losartan potassium                                   | 1,816 (8.0)  | 807 (7.3)   | 863 (8.5)     | 126 (9.9)  | 20 (16.7) | 349,504 (4.9) |
| Rosuvastatin calcium                                 | 1,773 (7.8)  | 762 (6.9)   | 882 (8.7)     | 114 (8.9)  | 15 (12.5) | 285,044 (4.0) |
| Metronidazole                                        | 1,705 (7.5)  | 720 (6.5)   | 865 (8.5)     | 111 (8.7)  | 9 (7.5)   | 424,702 (5.9) |
| Nitrofurantoin monohydrate/<br>nitrofurantoin, macro | 1,686 (7.4)  | 732 (6.6)   | 817 (8.0)     | 121 (9.5)  | 16 (13.3) | 377,633 (5.3) |
| Valacyclovir hydrochloride                           | 1,622 (7.2)  | 726 (6.6)   | 780 (7.7)     | 104 (8.2)  | 12 (10.0) | 389,058 (5.4) |
| Levofloxacin                                         | 1,615 (7.1)  | 649 (5.9)   | 809 (7.9)     | 140 (11.0) | 17 (14.2) | 229,883 (3.2) |

### Medicare population

| Prescription (n, %)       | All ET patients<br>N=10,343 | 0 qualified ET<br>treatments<br>n=6,061 | 1 qualified ET<br>treatment<br>n=3,617 | 2 qualified ET<br>treatments<br>n=597 | 3+ qualified ET<br>treatments<br>n=68 | All non-ET<br>patients<br>N=429,609 |
|---------------------------|-----------------------------|-----------------------------------------|----------------------------------------|---------------------------------------|---------------------------------------|-------------------------------------|
| Atorvastatin calcium      | 3,410 (33.0)                | 1,941 (32.0)                            | 1,229 (34.0)                           | 218 (36.5)                            | 22 (32.4)                             | 126,136 (29.4)                      |
| Propranolol hydrochloride | 2,820 (27.3)                | 825 (13.6)                              | 1,587 (43.9)                           | 361 (60.5)                            | 47 (69.1)                             | 4,21 (71.0)                         |
| Amoxicillin               | 2,596 (25.1)                | 1,501 (24.8)                            | 924 (25.5)                             | 149 (25.0)                            | 22 (32.4)                             | 93,937 (21.9)                       |
| Primidone                 | 2,517 (24.3)                | 685 (11.3)                              | 1,363 (37.7)                           | 409 (68.5)                            | 60 (88.2)                             | 446 (0.1)                           |
| Prednisone                | 2,476 (23.9)                | 1,352 (22.3)                            | 937 (25.9)                             | 163 (27.3)                            | 24 (35.3)                             | 79,894 (18.6)                       |
| Levothyroxine sodium      | 2,349 (22.7)                | 1,322 (21.8)                            | 843 (23.3)                             | 165 (27.6)                            | 19 (27.9)                             | 85,818 (20.0)                       |
| Azithromycin              | 2,339 (22.6)                | 1,227 (20.2)                            | 932 (25.8)                             | 162 (27.1)                            | 18 (26.5)                             | 79,584 (18.5)                       |
| Cephalexin                | 2,218 (21.4)                | 1,276 (21.1)                            | 780 (21.6)                             | 146 (24.5)                            | 16 (23.5)                             | 68,273 (15.9)                       |

|                                                  |              |              |              |            |           |               |
|--------------------------------------------------|--------------|--------------|--------------|------------|-----------|---------------|
| Amlodipine besylate                              | 2,202 (21.3) | 1,242 (20.5) | 809 (22.4)   | 136 (22.8) | 15 (22.1) | 86,695 (20.2) |
| Omeprazole                                       | 2,186 (21.1) | 1,187 (19.6) | 833 (23.0)   | 145 (24.3) | 21 (30.9) | 65,342 (15.2) |
| Gabapentin                                       | 2,099 (20.3) | 627 (10.3)   | 1,107 (30.6) | 315 (52.8) | 50 (73.5) | 46,407 (10.8) |
| Acetaminophen/hydrocodone bitartrate             | 2,021 (19.5) | 1,067 (17.6) | 787 (21.8)   | 150 (25.1) | 17 (25.0) | 62,303 (14.5) |
| Zoster vaccine recombinant, adjuvanted           | 1,986 (19.2) | 1,263 (20.8) | 620 (17.1)   | 91 (15.2)  | 12 (17.6) | 77,571 (18.1) |
| Fluticasone propionate                           | 1,949 (18.8) | 1,070 (17.7) | 728 (20.1)   | 134 (22.4) | 17 (25.0) | 60,937 (14.2) |
| Albuterol sulfate                                | 1,936 (18.7) | 1,008 (16.6) | 768 (21.2)   | 149 (25.0) | 11 (16.2) | 59,844 (13.9) |
| Ciprofloxacin hydrochloride                      | 1,823 (17.6) | 971 (16.0)   | 710 (19.6)   | 129 (21.6) | 13 (19.1) | 54,000 (12.6) |
| Lisinopril                                       | 1,795 (17.4) | 1,032 (17.0) | 622 (17.2)   | 122 (20.4) | 19 (27.9) | 71,860 (16.7) |
| Metoprolol succinate                             | 1,742 (16.8) | 1,147 (18.9) | 529 (14.6)   | 60 (10.1)  | 6 (8.8)   | 66,136 (15.4) |
| Furosemide                                       | 1,670 (16.1) | 874 (14.4)   | 638 (17.6)   | 144 (24.1) | 14 (20.6) | 48,009 (11.2) |
| Losartan potassium                               | 1,667 (16.1) | 979 (16.2)   | 592 (16.4)   | 83 (13.9)  | 13 (19.1) | 65,254 (15.2) |
| Amoxicillin/clavulanate potassium                | 1,660 (16.0) | 895 (14.8)   | 631 (17.4)   | 125 (20.9) | 9 (13.2)  | 55,862 (13.0) |
| Doxycycline hyclate                              | 1,556 (15.0) | 838 (13.8)   | 586 (16.2)   | 119 (19.9) | 13 (19.1) | 47,696 (11.1) |
| Tramadol hydrochloride                           | 1,552 (15.0) | 782 (12.9)   | 634 (17.5)   | 119 (19.9) | 17 (25.0) | 43,865 (10.2) |
| Tamsulosin hydrochloride                         | 1,524 (14.7) | 838 (13.8)   | 583 (16.1)   | 95 (15.9)  | 8 (11.8)  | 44,873 (10.4) |
| Methylprednisolone                               | 1,443 (14.0) | 755 (12.5)   | 579 (16.0)   | 101 (16.9) | 8 (11.8)  | 48,431 (11.3) |
| Metformin hydrochloride                          | 1,436 (13.9) | 755 (12.5)   | 563 (15.6)   | 105 (17.6) | 13 (19.1) | 58,171 (13.5) |
| Triamcinolone acetonide                          | 1,394 (13.5) | 787 (13.0)   | 504 (13.9)   | 89 (14.9)  | 14 (20.6) | 46,290 (10.8) |
| Simvastatin                                      | 1,390 (13.4) | 780 (12.9)   | 499 (13.8)   | 100 (16.8) | 11 (16.2) | 52,185 (12.1) |
| Pantoprazole sodium                              | 1,383 (13.4) | 745 (12.3)   | 540 (14.9)   | 92 (15.4)  | 6 (8.8)   | 38,678 (9.0)  |
| Sulfamethoxazole/trimethoprim                    | 1,364 (13.2) | 719 (11.9)   | 543 (15.0)   | 96 (16.1)  | 6 (8.8)   | 42,097 (9.8)  |
| Rosuvastatin calcium                             | 1,175 (11.4) | 614 (10.1)   | 461 (12.7)   | 88 (14.7)  | 12 (17.6) | 43,953 (10.2) |
| Hydrochlorothiazide                              | 1,133 (11.0) | 627 (10.3)   | 425 (11.8)   | 73 (12.2)  | 8 (11.8)  | 50,066 (11.7) |
| Potassium chloride                               | 1,107 (10.7) | 595 (9.8)    | 422 (11.7)   | 82 (13.7)  | 8 (11.8)  | 33,788 (7.9)  |
| Diclofenac sodium                                | 1,104 (10.7) | 552 (9.1)    | 459 (12.7)   | 77 (12.90) | 16 (23.5) | 34,227 (8.0)  |
| Nitrofurantoin monohydrate/nitrofurantoin, macro | 1,036 (10.0) | 591 (9.8)    | 377 (10.4)   | 62 (10.4)  | 6 (8.8)   | 29,971 (7.0)  |
| Mupirocin                                        | 1,023 (9.9)  | 536 (8.8)    | 412 (11.4)   | 68 (11.4)  | 7 (10.3)  | 30,491 (7.1)  |
| Meloxicam                                        | 1,019 (9.9)  | 551 (9.1)    | 405 (11.2)   | 56 (9.4)   | 7 (10.3)  | 34,902 (8.1)  |
| Metoprolol tartrate                              | 1,010 (9.8)  | 648 (10.7)   | 316 (8.7)    | 43 (7.2)   | 3 (4.4)   | 36,913 (8.6)  |
| Sertraline hydrochloride                         | 1,001 (9.7)  | 546 (9.0)    | 383 (10.6)   | 62 (10.4)  | 10 (14.7) | 22,094 (5.1)  |
| Apixaban                                         | 985 (9.5)    | 559 (9.2)    | 365 (10.1)   | 51 (8.5)   | 10 (14.7) | 29,144 (6.8)  |

|                                       |           |           |            |           |           |              |
|---------------------------------------|-----------|-----------|------------|-----------|-----------|--------------|
| Alprazolam                            | 984 (9.5) | 446 (7.4) | 454 (12.6) | 76 (12.7) | 8 (11.8)  | 24,645 (5.7) |
| Carbidopa/levodopa                    | 982 (9.5) | 575 (9.5) | 337 (9.3)  | 66 (11.1) | 4 (5.9)   | 4,876 (1.1)  |
| Levofloxacin                          | 981 (9.5) | 465 (7.7) | 407 (11.3) | 93 (15.6) | 16 (23.5) | 26,329 (6.1) |
| Benzonatate                           | 938 (9.1) | 365 (6.0) | 464 (12.8) | 98 (16.4) | 11 (16.2) | 29,279 (6.8) |
| Acetaminophen/oxycodone hydrochloride | 915 (8.8) | 411 (6.8) | 401 (11.1) | 91 (15.2) | 12 (17.6) | 24,961 (5.8) |
| Clopidogrel hydrogen sulfate          | 907 (8.8) | 540 (8.9) | 300 (8.3)  | 64 (10.7) | 3 (4.4)   | 27,807 (6.5) |
| Escitalopram oxalate                  | 875 (8.5) | 469 (7.7) | 349 (9.6)  | 53 (8.9)  | 4 (5.9)   | 18,792 (4.4) |
| Prednisolone acetate                  | 870 (8.4) | 497 (8.2) | 316 (8.7)  | 53 (8.9)  | 4 (5.9)   | 31,089 (7.2) |
| Clindamycin hydrochloride             | 848 (8.2) | 464 (7.7) | 312 (8.6)  | 66 (11.1) | 6 (8.8)   | 28,534 (6.6) |
| Montelukast sodium                    | 836 (8.1) | 451 (7.4) | 309 (8.5)  | 68 (11.4) | 8 (11.8)  | 25,583 (6.0) |

Key: ET – essential tremor.
