# Supplementary material for: Clinical and Economic Correlates of Pharmacotherapy in Patients with Essential Tremor
Source: PubMed Central journal article supplement (PMC11661014; doi:10.5334/tohm.973), 2024-12-17
Supplement: tohm-14-1-973-s2.pdf [file tohm-14-1-973-s2.pdf]

**S Table 2. ET-related healthcare resource utilization and costs**

| <b>Commercial population</b>      |                                     |                                                   |                                                  |                                                  |                                                 |
|-----------------------------------|-------------------------------------|---------------------------------------------------|--------------------------------------------------|--------------------------------------------------|-------------------------------------------------|
|                                   | <b>All ET patients<br/>N=22,641</b> | <b>0 qualified ET<br/>treatments<br/>n=11,052</b> | <b>1 qualified ET<br/>treatment<br/>n=10,195</b> | <b>2 qualified ET<br/>treatments<br/>n=1,274</b> | <b>3+ qualified ET<br/>treatments<br/>n=120</b> |
| Inpatient admission, n (%)        | 77 (0.3)                            | 21 (0.2)                                          | 36 (0.4)                                         | 19 (1.5)                                         | 1 (0.8)                                         |
| No., mean (SD)                    | 1.2 (0.4)                           | 1.1 (0.3)                                         | 1.1 (0.4)                                        | 1.3 (0.5)                                        | 1.0 (0.0)                                       |
| LOS, days, mean (SD)              | 1.0 (1.2)                           | 1.4 (0.8)                                         | 1.7 (1.4)                                        | 2.0 (1.1)                                        | 1.0 (0.0)                                       |
| Cost, mean (SD; median)           | \$57,254<br>(40,604; 48,609)        | \$53,770<br>(36,800; 52,463)                      | \$55,949<br>(44,064; 45,951)                     | \$65,824<br>(38,532; 52,418)                     | \$14,575<br>(0; 14,575)                         |
| ER visit, n (%)                   | 423 (1.9)                           | 153 (1.4)                                         | 225 (2.2)                                        | 43 (3.4)                                         | 2 (1.7)                                         |
| No., mean (SD)                    | 1.5 (0.9)                           | 1.4 (0.8)                                         | 1.6 (0.9)                                        | 1.7 (1.1)                                        | 2.0 (1.4)                                       |
| Cost, mean (SD; median)           | \$3,679 (5,380; 1,746)              | \$3,364 (5,820; 1,407)                            | \$3,827 (4,980; 1,967)                           | \$4,121 (5,923; 1,858)                           | \$1,564 (605; 1,564)                            |
| Pharmacy costs, mean (SD; median) | \$474 (1,846; 117)                  | \$25 (87; 8)                                      | \$448 (1,743; 132)                               | \$1,098 (2,873; 413)                             | \$2,029 (4,409; 812)                            |
| Total costs, mean (SD; median)    | \$2,504 (16,360; 260)               | \$1,873 (17,185; 207)                             | \$2,799 (13,610; 438)                            | \$5,508 (26,209; 438)                            | \$3,704 (11,910; 472)                           |
| <b>Medicare population</b>        |                                     |                                                   |                                                  |                                                  |                                                 |
|                                   | <b>All ET patients<br/>N=10,343</b> | <b>0 qualified ET<br/>treatments<br/>n=6,061</b>  | <b>1 qualified ET<br/>treatment<br/>n=3,617</b>  | <b>2 qualified ET<br/>treatments<br/>n=597</b>   | <b>3+ qualified ET<br/>treatments<br/>n=68</b>  |
| Inpatient admission (n, %)        | 55 (0.5)                            | 25 (0.4)                                          | 15 (0.4)                                         | 12 (2.0)                                         | 3 (4.4)                                         |
| No., mean (SD)                    | 1.1 (0.2)                           | 1.1 (0.3)                                         | 1.0 (0.0)                                        | 1.0 (0.0)                                        | 1.0 (0.0)                                       |
| LOS, days, mean (SD)              | 1.8 (1.4)                           | 2.0 (1.6)                                         | 2.2 (1.7)                                        | 1.3 (0.5)                                        | 1.3 (0.6)                                       |
| Cost, mean (SD; median)           | \$33,567<br>(38,166; 21,054)        | \$24,836<br>(16,606; 19,853)                      | \$26,044<br>(27,307; 20,889)                     | \$61,743<br>(65,128; 36,712)                     | \$31,240<br>(36,363; 19,471)                    |
| ED visit, n (%)                   | 378 (3.7)                           | 240 (4.0)                                         | 108 (3.0)                                        | 30 (5.0)                                         | 0 (0.0)                                         |
| No., mean (SD)                    | 1.9 (1.3)                           | 2.0 (1.5)                                         | 1.6 (0.9)                                        | 1.9 (1.5)                                        | 0.0 (0.0)                                       |
| Cost, mean (SD; median)           | \$2,407 (5,521; 1,461)              | \$2,021 (3,068; 1,600)                            | \$3,364 (9,136; 1,583)                           | \$2,051 (2,431; 1,145)                           | \$0 (0; 0)                                      |
| Pharmacy costs, mean (SD; median) | \$354 (1,152; 117)                  | \$177 (320; 40)                                   | \$351 (1,253; 125)                               | \$742 (1,485; 402)                               | \$1,583 (2,850; 901)                            |

|                                   |                       |                       |                       |                       |                         |
|-----------------------------------|-----------------------|-----------------------|-----------------------|-----------------------|-------------------------|
| Total costs, mean (SD;<br>median) | \$3,230 (17,371; 333) | \$2,510 (11,840; 272) | \$3,637 (18,196; 420) | \$7,415 (41,038; 623) | \$9,009 (28,340; 1.094) |
|-----------------------------------|-----------------------|-----------------------|-----------------------|-----------------------|-------------------------|

Key: ED – emergency department; ET – essential tremor; SD – standard deviation.
